1 Discordant expression profile between RNA and protein for the genes involved in immune  
2 response network in adenovirus type 2 infected cells

3

4 Hongxing Zhao\*, Maoshan Chen<sup>1</sup>, Alberto Valdés<sup>2</sup>, Sara Bergström Lind<sup>2</sup>, and Ulf Pettersson

5 Dept. of Immunology, Genetics and Pathology, Uppsala University, S-751 85 Uppsala,

6 Sweden.

7 <sup>1</sup>Department of Biochemistry and Genetics, La Trobe Institute for Molecular Science, La

8 Trobe University, Melbourne, Victoria 3086, Australia.

9 <sup>2</sup>Department of Chemistry-BMC, Analytical Chemistry, Uppsala University, Box 599, SE-

10 751 24 Uppsala, Sweden

11 \*Corresponding author:

12 E-mail address: [Hongxing.Zhao@igp.uu.se](mailto:Hongxing.Zhao@igp.uu.se) (H. Zhao).

13 Fax: +46 18 471 4808.

14 Running title: Gene expression profile in Ad2-infected cells

15

16

17

18 197 words in the abstract

19 6314 words for the text

20 **Abstract**

21 Alternation of cellular genes expressions during Adenovirus type 2 (Ad2) infection in IMR-90  
22 cells was studied using paired-end sequencing and stable isotope labeling of amino acids in  
23 cell culture mass spectrometric analysis (SILAC-MS). At transcriptional level, cellular genes  
24 involved in different pathways revealed distinct expression profiles. At early phase, the genes  
25 involved in regulation of cellular immune response, cellular signaling and cell growth control  
26 were among the most deregulated. Later follows, in an orderly fashion, genes involved in cell  
27 cycle control, DNA replication and further on genes engaged in RNA processing and protein  
28 translation. Comparison of cellular gene expression at transcriptional and posttranscriptional  
29 levels revealed low correlation. Here we highlight the genes which expose opposite  
30 expression profiles with an emphasis on key factors that play important roles in cellular  
31 immune pathways including NF $\kappa$ B, JAK/STAT, caspases and MAVS. Transcription of many  
32 of these genes was transiently induced early, but became down-regulated in the late phase. In  
33 contrast, their expressions at protein level were up-regulated early and so sustained until late  
34 phase of infection. Suppression at the transcriptional level and enhancement at the protein  
35 level of immune response genes most likely illustrate counteractions between Ad2 and its host  
36 cell.

37

38

39 **Importance**

40 Our paper comprises a state of the art quality transcriptomics data set unravelling the  
41 alterations in gene expression that take place during different phases of an adenovirus  
42 infection. The information allows us to draw conclusion about the cellular pathways that are  
43 perturbed by the virus. The data set also provides an important resource for scientists in  
44 general for future studies on mechanisms behind host/virus interactions in efforts to design  
45 tools for combatting virus infections.

46 Moreover, our paper includes novel proteomics information unravelling an unexpected role of  
47 post transcriptional events in cellular gene expression, demonstrating that the current picture  
48 of the adenovirus replication cycle is simplified.

49

## 50 Introduction

51 Human adenovirus (Ad) infection leads to alternations of host cell gene expression  
52 and biosynthetic processes. It is a stepwise, but efficient mode of turning host transcriptional,  
53 translation and metabolism to facilitate the replication of adenovirus. Most interactions  
54 between host cell and virus take place during the early phase. Adenovirus-mediated regulation  
55 of cellular gene expression emphasizes two major aspects: interference with host defense  
56 mechanisms and induction of its host cell to enter S-phase of the cell cycle. It has also been  
57 shown that cells are reprogrammed epigenetically as a result of adenovirus early-region  
58 function at different times after infection (1). Adenovirus expresses several regulatory  
59 proteins from early regions 1A (E1A), E1B, E3, and E4. E1A is the first viral gene expressed  
60 and plays essential roles in regulation of viral and cellular genes expression (2). E1A proteins  
61 are crucial for the induction of the S phase of the cell cycle, cell proliferation and cell  
62 transformation through its ability to target different cellular transcriptional regulators, such as  
63 pRb, p300/CBP, CtBP, p400/TRRAP (3-10). E1A proteins also interfere with host immune  
64 response by blocking type I IFN-inducible gene expression (11), as well as by preventing the  
65 peptide presentation to the immunoproteasome by interacting with MECL1 (12). E1B  
66 encodes two major proteins, the E1B-55K and E1B-19K proteins. E1B-55K is a multi-  
67 functional protein and plays a major role in counteracting the cellular proapoptotic program.  
68 Association of E1B-55k and E4 orf6 proteins with several cellular proteins, Cullin 5, TCEBs  
69 and RBX1 forms a virus-specific E3 ubiquitin ligase which then targets specific cellular  
70 proteins for degradation (13). The E1B-55K protein serves as the substrate-recognition  
71 subunit via distinct sequences and targets the p53 protein, thereby promoting degradation of  
72 p53 (14, 15). The E1B-19K protein is a viral Bcl-2 homologue that acts as a broad inhibitor of  
73 mitochondria-dependent apoptosis (16, 17). It interferes directly with the activity of p53 when  
74 translocated into the mitochondria (18). Proteins generated from the E3 region also play a

75 very important role in countering host antiviral defenses (19). E3-gp19K prevents the  
76 exposure of viral peptides on the cell surface by blocking the transport of the class I major  
77 histocompatibility complex (MHC I) molecule to the cell surface and the loading of peptides  
78 by tapasin (20-22). The E3-10.4K and 14.5K (RID $\alpha/\beta$ ) complex inhibits tumor necrosis factor  
79 alpha (TNF $\alpha$ ) and Fas ligand-induced apoptosis through internalization and degradation of the  
80 death domain containing receptors (23). In addition, the E3-10.4K/14.5K complex blocks the  
81 activation of NF $\kappa$ B by preventing it from entering the nucleus and inhibiting the activity of  
82 the kinase complex IKK (24). Proteins encoded by the E4 region are involved in  
83 transcriptional regulation. E4 orf6/7 stabilizes the binding of E2F to the duplicated E2F  
84 binding sites in the E2 promoter (25, 26). E4 orf3 associates with E1B 55K in the nuclear  
85 promyelocytic leukemia protein oncogenic domains (POD) and reorganizes PODs during  
86 infection, thus likely involved in the regulation of transcription factor availability and activity  
87 (27). The E4 orf4 protein interacts with protein phosphatase 2A, leading to the inhibition of  
88 E1A-dependent transactivation of the junB promoter (28).

89         When adenovirus DNA replication commences, the infection cycle proceeds into the  
90 late phase and viral transcription changes from the early to the late pattern. E1A expression  
91 switches from a preference for the 289R transcriptional activator to the shorter E1A-243R  
92 protein (29). The E1A-243R protein functions mainly as a transcriptional repressor through its  
93 binding of p300/CBP (30). The L4-100 kDa protein, expressed from the major late  
94 transcription unit is necessary for efficient initiation of viral late mRNA translation (31-33).  
95 Furthermore, the E1B-55 kDa and E4 orf4 protein complex is involved in regulation of  
96 mRNA export from nucleus, resulting in a block of cellular mRNAs export and selective  
97 export of viral mRNAs (34, 35). As a consequence a dramatic down-regulation of cellular  
98 gene expression occurs late in infection (36).

99           Most studies of the adenovirus infection have been performed in HeLa cells, in which  
100 adenovirus replication is very efficient and the infectious cycle is completed after 20-24  
101 hours. Particularly, the early phase is very short, lasting for less than 6 hours. Thus, there is a  
102 narrow time window for a detailed examination of the changes of cellular gene expression.  
103 Furthermore, being transformed cells, HeLa cells grow rapidly and are difficult to synchronize.  
104 Thus, genes involved in the control of cell cycle and growth might escape detection.  
105 Therefore, human primary cells, like human lung fibroblasts (IMR-90) or foreskin cells  
106 (HFFs) have been used for a series of studies (36-40). In these cells adenovirus DNA  
107 replication starts 24 hours post infection (hpi). Based on cellular transcription profiles, an  
108 adenovirus type 2 (Ad2) infection of IMR-90 cells can be divided into four periods (36). The  
109 first period (1-12 hpi) extends from the attachment of Ad2 to the cell surface to the beginning  
110 of adenoviral early gene expression. During this time, the cellular gene expression changes  
111 are mainly triggered by the virus entry process, including attachment of the virus to cell  
112 surface receptors, and intracellular transport of the virus along microtubules. The majority of  
113 the genes deregulated during the first phase have functions linked to inhibition of cell growth  
114 and immune response. The second period covers the time from the expression of the  
115 immediate early E1A gene to the time when Ad2 DNA replication starts (12-24 hpi). During  
116 this period, there is a linear increase in the number of differentially expressed cellular genes  
117 involved primarily in cell cycle regulation and cell proliferation. The third period ranges from  
118 the beginning of DNA replication to the time when the cytopathic effect (CPE) starts (24-36  
119 hpi). By this time, the virus has gained control of the cellular metabolic machinery, resulting  
120 in an efficient replication of the viral genome and expression of the capsid proteins.  
121 Additional changes in cellular gene expression are modest during this phase. The final period  
122 starts when CPE is apparent (after 36 hpi). The number of down-regulated genes increases

123 dramatically and include many genes involved in intra- and extracellular structure, leading to  
124 an efficient burst of progeny.

125         The transcriptomics and proteomics of host cell during human adenovirus infection  
126 have been extensively studied (39-43). Early studies of cellular genes expression in  
127 adenovirus subtype C infected quiescent fibroblasts using microarray showed that genes  
128 involved in the control of cell cycle, proliferation, and growth were most highly up-regulated,  
129 while genes implicate in immune response were most significant among down-regulated  
130 genes during the early phase of infection (36, 40). With the development of high throughput  
131 sequencing technologies, the transcriptome can be explored on a genome-wide scale at single  
132 base pair resolution. A large number of differentially expressed cellular genes have been  
133 identified, and they are classified into similar gene ontology categories as identified by  
134 microarray (42). Binding sites for E2F, ATF/CREB and AP2 are prevalent in the up-regulated  
135 genes while SRF and NFkB are most dominant among down-regulated genes at two time  
136 points (12 and 24 hpi) as described in a previous study (42). Meanwhile, several proteomics  
137 approaches have been applied. Improve shotgun/bottom-up liquid chromatography-tandem  
138 mass spectrometry (LC-MS/MS)-based protein detection and quantitative techniques such as  
139 Stable Isotope Labelling of Amino acids in Cell culture (SILAC) have greatly facilitated  
140 protein identification (44, 45). These technologies have been used in studies of protein  
141 expression in an adenovirus-infected cells. Lam et al have analyzed the nucleolar proteome in  
142 Ad5-infected Hela cells (46) while Evans et al have examined the posttranscriptional stability  
143 of cellular protein in Ad5-infected Hela cells (41). Recently, a comparative proteome analysis  
144 of wild type and E1B-55K was performed to investigate the role of Ad5 E1B-55K in targeting  
145 cellular proteins with antiviral activity for proteasomal degradation (47). Furthermore, using a  
146 combined immunoaffinity purification and LC-MS protocol, a set of 92 E1B-associated  
147 proteins were identified in Ad5-infected HFFs and it was shown that these proteins are

148 enriched for function in the ubiquitin-proteasome system, RNA metabolism and cell cycle  
149 (48). Previously, we have presented a comparison of the cellular transcriptome and proteome  
150 of Ad2-infected IMR-90 cell at 24 and 36 hpi (39). More than 700 proteins were identified to  
151 be differentially expressed. Surprisingly, there was a very low correlation between the RNA  
152 and protein expression profiles. Here, we present a more comprehensive study of the cellular  
153 transcription profiles at four critical stages of an adenovirus infection in normal cell using  
154 paired-end sequencing. As a step further, RNA expression profiles were compared with  
155 protein expression profiles with a focus on genes involved in the cellular immune response.

156



157 Materials and methods

158 Cell culture and virus infection

159 Human primary lung fibroblast IMR-90 cells (American Type Culture Collection,  
160 ATCC) were initially cultured in Eagle's minimum essential medium (EMEM) (ATCC)  
161 supplemented with 10% fetal bovine serum (FCS), 100 U/ml penicillin and 100 µg/ml  
162 streptomycin at 37 °C and 5% CO<sub>2</sub>. Cells were maintained in the plates for two days before  
163 infection. By fluorescence-activated cell sorting (FACS) analysis, more than 95% of the cells  
164 were characterized in G0/G1 phase. Synchronized cells were then infected with human  
165 adenovirus type 2 at a multiplicity of infection (MOI) of 100 fluorescence-forming units  
166 (FFU) in serum-free medium. Mock-infected cells were used as a control. One hour later, the  
167 medium was replaced with complete EMEM medium supplemented with 10% FBS. Infected  
168 cells were harvested and collected at 6, 12, 24, and 36 hours post infection (hpi).

169 Total RNA extraction, RNA library construction and sequencing

170 Total RNA from infected IMR-90 cells were extracted with TRIzol<sup>®</sup> (Invitrogen),  
171 according to the manufacturer's instructions. The quality of total RNA was evaluated with a  
172 NanoDrop 1000 spectrophotometer and an Agilent 2100 Bioanalyzer. After treatment with  
173 Ribo-Zero<sup>™</sup> rRNA removal reagent, total RNA was used to construct cDNA library for  
174 transcriptome sequencing following the ScriptSeq<sup>™</sup> v2 RNA-Seq library preparation kit  
175 according to the manufacturer's protocol (Epicentre). The cDNA libraries were sequenced on  
176 a HiSeq 2000 sequencing platform (Illumina).

177 Genome alignment and gene expression profile

178 Data cleaning was performed by removing low quality, contaminant and adapter  
179 reads from the raw reads. TopHat2 and Cufflinks were used to align the filtered reads to  
180 human Ensembl genome (<http://www.ensembl.org/index.html>, GRCh38) and to profile gene

181 expression following the protocol (49), respectively. FPKM (fragments per kilobase of exon  
182 per million fragments mapped) method was employed to normalize gene expression. To  
183 strengthen the reliability of our results, lowly expressed genes (< 10 FPKM in all libraries)  
184 were filtered out.

#### 185 Identification of differentially expressed genes in Ad2-infected cells

186 To identify genes deregulated in early and late phases of Ad2 infection, we  
187 performed correlation analysis between samples based on normalized gene expression values  
188 using the CORREL function provided by Excel. To identify differentially expressed genes in  
189 the cells infected by Ad2, several statistical values were used. First, a fold change of a  
190 particular gene in Ad2-infected cells was calculated following the rule: fold change (Ad2-  
191 infected/mock) =y/x, while y and x represent the normalized expression values in Ad2-  
192 infected and mock cells, respectively. A cut-off of more than 2-fold increase or decrease was  
193 used. Second, a p-value that represents the significance for differential expression was  
194 calculated based on Poisson distribution (50). A cut-off for p-values (< 0.05) was used for  
195 differentially expressed genes. Last, an R package called NOISeq was used to calculate the  
196 probability of differential expression of a gene in a comparison (51). Only those genes with  
197 probability > 0.7 were kept for further analysis.

#### 198 Gene Ontology and KEGG pathway enrichment

199 To determine the biological processes and KEGG pathways affected by human adenovirus  
200 type 2, differentially expressed genes were analyzed by DAVID Bioinformatics Resources 6.7  
201 (<http://david.abcc.ncifcrf.gov/>) (52).

#### 202 **SILAC-MS experiment and protein identification**

203 The IMR-90 cells culture and protein labelling were performed as described before (36).  
204 Briefly, after growing in cell culture medium containing with heavy or light amino acids for at

205 least six passages, cells were mock infected or infected with Ad2 at MOI of 100 FFU per cell  
206 in serum-free medium (53). A biological replicate with swapped labeling was also performed.  
207 After harvest, cells were lysed and mock- and Ad2-infected lysates of different labeling were  
208 combined in a 1:1 protein ratio. Proteins were fractionated using SDS-PAGE. Following in-  
209 gel tryptic digestion (54), peptides were extracted and analyzed using nano liquid  
210 chromatography coupled on-line to a QExactive Orbitrap Plus Mass spectrometer  
211 (ThermoFisher Scientific, Bremen, Germany). Acquired data (raw-files) were imported into  
212 MaxQuant software (version:1.4.5.7) (55), and searched against a FASTA-file containing  
213 both cellular and Ad2 proteins downloaded from UniProt 2017-02. The ratio of the  
214 chromatographic areas of heavy and light peptides matching to specific proteins was used for  
215 determining the protein expression levels.

216

## 217 **Results and discussion**

### 218 **Host cell transcriptional profiles during the course of an adenovirus infection**

219 Alternation of cellular transcription in adenovirus infected cells has been studied  
220 before using RNA sequencing (36). However, this study included only two time points (12  
221 and 24 hpi) in lung fibroblast using constrained 76 bp long sequencing reads. Therefore, a  
222 more detailed study of transcription at different phases of infection using a up-graded  
223 sequencing technique is recalled. Furthermore, the correlation between transcription and  
224 protein expression need to be addressed. To this end, we have applied paired-end sequencing  
225 technology to examine the cellular RNA expression profile at 6, 12, 24 and 36 hours post  
226 infection (hpi) of IMR-90 cells. These time points represent different stages of Ad2 infection  
227 and all of our early studies on cellular various RNA expression including micro RNA  
228 (miRNA), long non-coding (lncRNA) and protein were performed under the same condition  
229 (36-38). Thus, we could correlated the expression profile between them. About 30 million 255  
230 bp long sequence reads per sample were generated and 53-58% of them accounted for mRNA.  
231 From them 6,860 cellular genes were identified to be transcribed to a significant level with a  
232 minimum of 10 FPKM (fragments per kilobase of exon per million fragments mapped) (Table  
233 1). Among them, 3556 genes were changed more than or equal to 2-fold with p-values<0.05  
234 in infected cells as compared to non-infected cell. This selection of differentially expressed  
235 genes is strict. Very limited changes in RNA expression occurs during the early phases. Only  
236 74 and 223 genes showed significant differential expression at 6 and 12 hpi, respectively.  
237 Most expression changes took place at 24 hpi when infection proceeded into the late phase,  
238 2239 and 3060 genes were differentially expressed at 24 and 36 hpi, respectively. Fewer  
239 differentially expressed genes were detected in this study as compared to our early study, in  
240 which 1267 and 3683 cellular genes were selected as differentially expressed at 12 and 24 hpi.

241 However, the former study was less stringent and included gene covered with more than 1  
242 reads (42).

243 Based on the kinetics of changes of gene expression at different stages of infection,  
244 3451 out of 3556 genes fell into 20 major different expression clusters (Figure 1). The  
245 complete list of genes in each cluster is included in supplementary Table S1. At 6 hpi, more  
246 than 87% of the differentially expressed genes were up-regulated (cluster 1+2+3+4).  
247 Expression of nearly all of these genes reached their highest level at 6 hpi, except two which  
248 reached their highest levels at 12 hpi. Then about 80% of them became down-regulated during  
249 the late phase of infection (clusters 1 and cluster 2). The rest either remained up-regulated  
250 (cluster 4), or were gradually reduced to the basal level in the late phase (cluster 3). Only 9  
251 genes (cluster 5) were down-regulated at 6 hpi and their expression remained suppressed until  
252 the late phase.

253 At 12 hpi, 122 and 78 genes, became up- and down-regulated in addition to the  
254 differentially expressed genes at 6 hpi. Among the up-regulated genes, about 1/3 increased  
255 until 36 hpi (Cluster 6), 1/3 remained at a similar level through the rest of the infection  
256 (cluster 7), and the remaining 1/3 was only transiently up-regulated at 12 hpi (Cluster 9) and  
257 became down-regulated at 24 hpi (cluster 11) or at 36 hpi (cluster 10). Except one gene, all  
258 down-regulated genes at 12 hpi remained suppressed until the late phase (cluster 12).

259 The most dramatic changes in gene expression took place between 12 to 24 hpi then  
260 the infection proceeded from the early to the late phase. Thus, expression of 1585 and 447  
261 (2032 in total) additional genes were up- and down-regulated at 24 hpi. Based on the  
262 expression changes at 36 hpi, the up-regulated genes at 24 hpi fell into four profiles (Cluster  
263 13+14+15+16). Expression of 59% of these genes increased until 36 hpi (Cluster 13), whereas  
264 25% decreased but remained higher (>2-fold) than in non-infected cells (Cluster 14) and 15%  
265 declined to less than 2-fold change at 36 hpi (Cluster 15). Only 6 genes became down-

266 regulated at 36 hpi (Cluster 16). Among 447 down-regulated genes, 75% decreased  
267 continually until 36 hpi (Cluster 17), while 25% remained at a similar level (Cluster 18).  
268 Change in cellular gene expression was modest between 24 to 36 hpi as compared to that  
269 between 12 to 24 hpi. In comparison to non-infected cells, expression of 737 (Cluster 19) and  
270 408 genes (Cluster 20) became up- or down-regulated at 36 hpi in addition to the genes that  
271 were differentially expressed at 12 or 24 hpi.

## 272 **Biological functions of genes in different expression clusters**

273 The biological consequences of the gene expression changes were analyzed using  
274 DAVID (The Database for Annotation, Visualization and Integrated Discovery) and are  
275 shown in Figure 1 (left hand panel), and more detailed results are included in supplementary  
276 Table S1. The most significant functions of the genes that were transiently up-regulated at 6  
277 hpi (clusters 1-3) were cellular proliferation, antiviral response and cellular signaling. A  
278 significant group of genes was cytokines involved stress/immune response and cell growth  
279 control. Genes implicated in apoptosis and cell cycle control were also noteworthy. Among  
280 transcription factors, up-regulation of ATF3 was the most significant since it reached 6-fold  
281 compared to the non-infected control. Expression of ATF3 has been shown to be induced by a  
282 variety of signals and is involved in cellular stress response. Only 9 genes were present in  
283 cluster 5 and therefore no significant functional categories could be identified by DAVID.  
284 However, four (PTPN12, MAP4K3, ERRF1 and LBH) out of the 9 genes, are involved in  
285 cellular signaling and growth control.

286 During the period between 6 and 12 hpi, adenovirus early genes begin to be expressed,  
287 redirecting cellular gene expression. The up-regulated cellular genes are involved in DNA  
288 replication (Clusters 6 and 7), including Minichromosome Maintenance Complex  
289 Components (MCM) 3, 4, 5, 6, 7 and components of the post-replicative DNA mismatch

290 repair system (MMR) alpha (MSH2-MSH6 heterodimer). In addition, genes implicate in  
291 transcription and pre-RNA processing were prominent in cluster 6. Genes implicated in cell  
292 cycle were significant in Cluster 7, including CDC25A, CCNE2, CCNE1 and CDK2, the key  
293 regulators for the progression from G1 to the S phase. Although no significant function was  
294 identified for clusters 8 to 11, several genes, such as JunB, GADD45B and PAPPA function  
295 in control of cell growth and proliferation were included in this cluster. The most significant  
296 function for the down-regulated genes was actin cytoskeleton organization.

297         There was a dramatic increase in the number of differentially expressed genes between  
298 12-24 hpi. Cellular genes which function in protein translation became significant among up-  
299 regulated genes. These genes covered both cytoplasmic and mitochondrial ribosomal proteins  
300 (RPLs/RPSs and MRPLs/MRPSs), eukaryotic translation initiation factors (EIFs), and  
301 eukaryotic translation elongation factors (EEFs). Although genes involved in DNA replication  
302 and cell cycle were still significant, similar to those at 12 hpi, the number of genes in these  
303 categories increased dramatically. For instance, genes involved in DNA metabolism/DNA  
304 replication increased from 18 to 124, whereas genes implicated in cell cycle increased from  
305 19 to 153. Most of these genes were included in clusters 13, 14 and 15. The genes involved in  
306 DNA replication included DNA polymerases, replication factor C (RFC) and histones from all  
307 five families. The large number of genes involved in the cell cycle included many key  
308 regulators, such as E2Fs, cyclins, cyclin dependent kinases and cell division cycle (cdc)  
309 genes. In addition, genes participating in RNA processing became significant, comprising  
310 RNA helicases, the splicing factors, U2 small nuclear RNA auxiliary factors, U3 small  
311 nucleolar ribonucleoprotein, U6 small nuclear RNA associated, pre-mRNA processing factors  
312 (PRPFs), heterogeneous nuclear ribonucleoproteins (HNRNPs) and small nuclear  
313 ribonucleoproteins (SNRNPs). Furthermore, the THO complexes 3, required for efficient  
314 export of polyadenylated RNA, were up-regulated, as were the cleavage and polyadenylation

315 specificity factors (CPSFs), playing a key role in the 3' end cleavage of pre-mRNAs and  
316 polyadenylation. Several important components of the exosome complex involved in the  
317 degradation and processing of a wide variety of RNA species were also up-regulated.

318         The number of down-regulated genes between 12 and 24 hpi also increased (clusters  
319 17 and 18). The most significant function of these clusters were cellular signaling, such as  
320 TGFBR1, TGFBR2, BMPR2, ACVR1 and SMAD3 involved in TGF $\beta$  signaling, as well as  
321 growth factors, like EGFR, DGFRA, HBEGF, PDGFC, PLAT, TXNIP, ZFAND5, ARID5B,  
322 BCAR1, PDGFRA, PDGFC, VEGFC, NRP1 and PDGFRB. Cytoskeleton organization was  
323 significant for genes in cluster 17, whereas genes implicated in cell adhesion were significant  
324 in cluster 18.

325         Previous experiments have shown that the replication of Ad2 DNA reaches a  
326 maximum rate during the period from 24 to 36 hpi (36). However, cellular gene expression  
327 was still maintained at a high level. The most significant function of the up-regulated genes  
328 (cluster 19) was protein translation similar to that at 24 hpi, but with an increased number of  
329 genes. Genes involved in the generation of precursor metabolites and energy, as well as  
330 oxidation reduction became significant. In addition, several genes identified in different  
331 diseases were also significant. The major function for the down-regulated genes (cluster 20)  
332 was cellular macromolecule catabolic processes such as ubiquitination and subsequent  
333 proteasomal degradation of target proteins. Another significant function was small GTPase  
334 mediated signal transduction, involved in vesicle transport.

### 335 **Consensus transcription factor binding sites in the promoter region of genes in the** 336 **different clusters**

337         Genes sharing a similar transcription profile are likely to be regulated by the common  
338 transcription factors (TF) or TFs from the same family. To this end, the genes in the 20



339 different clusters were subjected to analysis for the presence of consensus TF binding sites in  
340 their promoter regions (-300 to +100) using Transfind (56). The top ten of the over-  
341 represented TF binding sites are listed in the order of significance and are included in the  
342 supplementary Table S2. NF $\kappa$ B and c-Rel binding sites were most significant for the genes in  
343 cluster 1. Interesting genes among them were BIRC3, IKBA, IL8, CCL20, GROA (CXCL1),  
344 TNAP3 and TNF15. These genes are known to be involved in immune response or apoptosis.  
345 No significant enrichment of TF binding sites was identified for the genes in clusters 2, 3, 4,  
346 5. For the genes in clusters 6 and 7, only the E2F binding site was significant. Genes with E2F  
347 binding sites became more significant in clusters 13, 14 and 19. In addition, the binding sites  
348 for GABP, NRF1, and ATF/CREB family were significant among genes in clusters 13, 14  
349 and 15. GABP regulates genes that are involved in cell cycle control, protein synthesis, and  
350 cellular metabolism. NRF1 activates the expression of key metabolic genes regulating cellular  
351 growth. The ATF/CREB family has diverse functions in controlling cell proliferation and  
352 apoptosis. In contrast, the TF binding sites among the down-regulated genes were less  
353 significant. Only the MZF1 and AP2 binding sites were scored but their significance was low  
354 and they were only present on 8 or 7 genes, respectively. MZF1 can function as a  
355 tumor/growth suppressor and controls cell proliferation and tumorigenesis (57). At 36 hpi,  
356 different sets of TF binding sites became significant for up-regulated genes (cluster 19),  
357 including SP1, STRA13 and NF-Y in addition to GABP while the binding sites for E2F  
358 became less significant. This correlated very well with the expression profile of E2Fs.  
359 Expression of all E2Fs increased at 12 and 24 hpi, and then decreased at 36 hpi. The TF  
360 binding sites for the down-regulated genes were less significant and STRA13 and USF were  
361 on the top of the list. STRA13 is a transcriptional repressor. Correspondingly, its expression  
362 increased 4 and 8 times at 24 and 36 hpi, respectively. STRA13 is involved in DNA damage  
363 repair and genome maintenance. Surprisingly, the STRA13 binding site was significant for

364 both up- and down-regulated genes at 36 hpi. Its transcriptional repression is probably  
365 mediated by recruitment of other regulatory factors and, depending on the cofactors, STRA13  
366 plays divergent roles. USF that binds to a symmetrical DNA sequence (E-boxes; 5-CACGTG-  
367 3) is involved in the transcriptional activation of various genes implicated in physiological  
368 processes, such as stress response, immune response, cell cycle control and tumor growth.

369 **Inconsistency between changes in RNA and protein expression highlighted in genes**  
370 **involved the cellular immune signaling pathway**

371 About 35% of genes that were expressed at the RNA level here were detected at the  
372 protein level at 24 and 36 hpi as shown in our previous study using high throughput SILAC-  
373 MS technology (Zhao et al 2017). Among 2648 and 2394 proteins that were detected at 24  
374 and 36 hpi, expression of 659 and 645 protein were changed  $\geq 1.6$ -fold as compared to the  
375 uninfected control. The correlation between changes in RNA and protein expression was  
376 surprisingly low ( $r=0.3$ ). The functions of the discordantly expressed proteins were analyzed  
377 using the web-based tool DAVID, a functional enrichment analysis by intergrating a wide-  
378 range heterogeneous data content. However, this tool is less specific for analysis data of  
379 virus-induced changes in gene expression because of under representative of genes related to  
380 virus infection. In addition, our previous analysis included only proteins that had minimum  
381 fold-change of 1.6 and proteins with a slow kinetic of synthesis or degradation might have  
382 escaped detection. Nonetheless, we noted that several genes which showed opposite profiles  
383 for RNA and protein expression were involved in immune response. Here, we have extended  
384 our comparison between RNA and protein expression on genes involved in cellular immune  
385 pathways including new SILAC-MS data for 6 and 12 hpi (manuscript submitted for  
386 publication). Significantly, many key regulators in cellular immune pathways, NF $\kappa$ B, STAT,  
387 apoptosis and MAV displayed inconsistent expression profiles between RNA and protein  
388 expression as listed Table 2 and their expression profiles are shown in Figure 2.

389 As presented above, NF $\kappa$ B and c-Rel binding sites were the most significant in the  
390 promoter region of genes that were transiently up-regulated during the early phase. Indeed,  
391 expression of several key factors of the NF $\kappa$ B pathway were significantly changed at both the  
392 RNA and protein levels (Figure 2A). The transcription of all NF $\kappa$ B family members was  
393 detectable, and NF $\kappa$ B1 was the most highly expressed. Except REL, all showed very similar  
394 expression profiles. Specifically, they were moderately induced during the early phase, but  
395 decreased rapidly and became down-regulated after 24 hpi. Among them, expression of  
396 RELA, NF $\kappa$ B1 and NF $\kappa$ B2 was also detectable at the protein level. Coupled with the  
397 increased RNA level at 6 hpi, these proteins were all up-regulated. Unexpectedly the NF $\kappa$ B2  
398 and RELA protein levels remained constant until the late phase of infection in spite of the  
399 reduction in transcription. The members of NF $\kappa$ B inhibitor family (I $\kappa$ B) displayed diverse  
400 transcription profiles. NFKBIA (I $\kappa$ B $\alpha$ ) and NFKBIZ (I $\kappa$ B $\zeta$ ) were the most highly expressed  
401 and showed similar expression profiles, transiently up-regulated at 6 hpi but decreased at 12  
402 hpi and were reduced more than 8-fold at 36 hpi. NF $\kappa$ BIB (I $\kappa$ B $\beta$ ) showed an opposite  
403 expression pattern, low in uninfected cells and at 6 hpi, but increased after 12 hpi and became  
404 up-regulated more than 16-fold at 36 hpi. Thus, it appears that NFKBIB replaced NFKBIA to  
405 be the most highly expressed I $\kappa$ B in the late phase. None of these gene products was detected  
406 at the protein level. The expression changes of the inhibitors of NF $\kappa$ B kinases (IKKs) subunit,  
407 IKBKB, and its regulatory subunit IKBKG, as well as IKK-related kinases, IKBKE and  
408 TBK1, appeared to be coordinated. They were delayed as compared to the expression of  
409 NF $\kappa$ Bs and I $\kappa$ Bs and significant down-regulation of transcription occurred at 24 or 36 hpi. A  
410 surprising finding was that the expression of IKBKB and TBK1 was up-regulated at the  
411 proteins level. The IKBKB protein was up-regulated already at 6 hpi and remained stable until  
412 the late phase while the up-regulation of the TBK1 protein was significant after 24 hpi. The

413 results thus indicate that the positive regulators of the NF $\kappa$ B pathway are activated at both the  
414 RNA and protein levels during the early phase of infection as result of the host immediate  
415 response to the infection. Following the progression of the infection, these proteins remained  
416 up-regulated until 36 hpi although their transcription was suppressed. However, the fact that  
417 the downstream target genes of the NF $\kappa$ B pathway were down-regulated during the late phase  
418 indicates that these proteins have lost their functions as transcriptional activators. The  
419 dramatic up-regulation of NFKIB may contribute to the inhibition of the NF $\kappa$ B activity. Other  
420 post-translational control mechanisms, such as the blocking of the nuclear transport, loss of its  
421 coactivator such as CBP/P300, p400 and TRAPP due to interaction with the Ad2 E1A protein,  
422 may contribute to the block of the NF $\kappa$ B activity (58, 59). Other yet unidentified mechanism  
423 might also cause the inactivation of the NF $\kappa$ B pathway.

424       The Janus kinase-signal transducer and activator of transcription (JAK/STAT) signaling  
425 is another important pathway regulating the innate immune response. Transcription of all  
426 STATs (STAT1, STAT2, STAT3, STAT5A/B and STAT6) was unchanged up to 12 hpi, but  
427 were then down-regulated after 24 hpi. Four STAT proteins (STAT1, STAT2, STAT3 and  
428 STAT6) were detected and they were up-regulated during the early phase and remained stable  
429 or decreased slightly in the late phase. JAKs are important activators of STAT and catalyse  
430 the phosphorylation of the STAT proteins. The three JAK kinases, JAK1, JAK2 and TYK2,  
431 displayed different expression profiles. JAK1 was the most highly transcribed and only  
432 slightly increased at 6 hpi. Then, it decreased to the basic level and remained constant until  
433 the late phase. Transcription of both JAK2 and TYK2 increased at 12 hpi. JAK2 decreased  
434 during the late phase while TYK2 remained constant. Only JAK1 protein was detected and it  
435 decreased slightly during the early phase, but became up-regulated at 24 hpi. The activity of  
436 the STAT proteins is also controlled by several negative regulators, including protein tyrosine  
437 phosphatase (PTPN), suppressor of cytokine signaling (SOCS) and protein inhibitor of

438 activated STAT (PIAS). Several PTPNs were detected at both RNA and protein levels with  
439 inconsistent expression profiles. Either their RNAs were down-regulated, while their protein  
440 levels remained constant ( PTPN1) or increased (PTPN12). In other cases the RNA remained  
441 stable, while the protein level was increased (PTPN11). Furthermore, several Importins and  
442 Ran, required for nuclear translocation of STATs, were up-regulated at both at the RNA and  
443 protein levels during the infection. Suppression of STAT transcription and promotion of  
444 STAT translation during Ad2 infection might reflect an aspect of the battle between the virus  
445 and its host. Through several distinct routes the infected cells recognize different viral  
446 components and active the expression of IFN $\beta$  which leads the stimulation of the JAK/STAT  
447 pathway. In turn, viruses have developed strategies to circumvent the IFN $\beta$  response (60).  
448 Expression of most, if not all, of the downstream targets of the STAT pathway were  
449 suppressed, indicating that the STAT pathway is blocked (data not shown). Apparently, the  
450 inhibition of the STAT pathway occurs both transcriptional and post-translationally. The  
451 activity of STATs has been shown to be modulated by various posttranslational modifications  
452 (61, 62). Upon infection, adenovirus uses several strategies to block the STAT pathway. The  
453 viral E1A plays a significant role in the inactivation of the STAT pathway by binding to  
454 STATs, or their coactivator CBP/p300.(11, 63-65). Meanwhile, the E1B-55k protein represses  
455 expression of IFN-inducible genes which leads to the inhibition of the STAT signaling  
456 pathway (66). In addition, E3-14.7K protein interacts with STAT1 which results in the  
457 inhibition of STAT1 phosphorylation and nuclear translocation (67). Furthermore,  
458 phosphorylated STAT1 has been shown to be sequestered at viral replication centers in the  
459 nuclues (68).

460 Apoptosis pathways are extensively regulated during Ad2 infection. Our RNA  
461 sequencing results showed that transcription of more than 60% of genes that are directly  
462 involved in apoptosis were down-regulated, whereas only 20% were up-regulated in the late

463 phase (data not shown). Transcription of most TNF family ligands was undetectable or at a  
464 very low level except for TNFSF15 and TNFSF4 (Table 2). Both of them decreased after 12  
465 hpi, although TNFSF15 was transiently induced more than 6-fold at 6 hpi. Numerous TNF  
466 receptor superfamily members were expressed at the transcriptional level with diverse  
467 expression profiles. TNFRSF11B and TNFRSF12A were the most highly expressed receptors.  
468 After being slightly increased at 6 hpi, their RNA levels decreased at 12 hpi and were then  
469 more than 25- and 6-fold lower at 36 hpi as compared to the non-infected control.  
470 Unfortunately, none of the TNF receptor superfamily members was detected at the protein  
471 level.

472 Caspases (CASPs) and the Bcl2 families are key player in apoptosis. At the  
473 transcriptional level, CASPs showed different expression profiles. Among them, CASP1, 3  
474 and 4 are most highly expressed with similar expression profiles, slightly increased at 6 hpi  
475 and then down-regulated. All of these CASPs were detected at the protein level and were up-  
476 regulated, opposite to their RNA expression profile. Expressions of most Bcl2 family  
477 members were low at the RNA level except for those listed in the Table 2. Transcriptions of  
478 most anti-apoptotic BCLs (BCI2A1, BCL2L1, BCL2L13 and MCL1) were down-regulated  
479 after a slight increase at 6 hpi. Among them, only BCL2L13 protein was detected which  
480 showed 40% increased expression during the late phase. Among pro-apoptotic genes,  
481 transcription of BID, BAD and BAX was up-regulated gradually towards the late phase or  
482 remained stable. At the protein level, BID and BAX were up-regulated from the early to the  
483 late phase, although the RNA level for BAX decreased in the late phase. BAD protein  
484 displayed an expression pattern opposite to its RNA.

485 Although most genes that are directly involved in apoptosis were down-regulated at the  
486 transcriptional level, several important pro-apoptotic players were up-regulated at the protein  
487 level (CASP3, BAX and BID). The fact that apoptosis is efficiently inhibited during an

488 adenovirus infection indicated that the functions of these proteins must be inactivated. To  
489 counteract the host defensive apoptotic pathways, adenoviruses have established very efficient  
490 mechanisms by encoding their own anti-apoptotic proteins in the E1B and E3 regions.  
491 Obviously, the regulation of apoptosis is very multifaceted and a comprehensive view of how  
492 apoptosis is blocked during an Ad2 infection remains to be unraveled.

493 Inconsistent expression profiles between RNA and protein for the genes involved in  
494 MAVS was shown in our previous study (39). We show here that expression of MAVS is  
495 stable at both RNA and protein levels during the early phase, whereas difference were seen in  
496 the late phase. In addition, we have studied the expression of three MAVS regulatory proteins,  
497 PSMA7, PCBP2 and TBK1. The expression profiles of the negative regulators PSMA7 and  
498 PCBP2 were similar at both the RNA and protein levels, and increased slowly during  
499 infection. The positive regulator, TBK1 showed an opposite profile; its RNA was down-  
500 regulated at 36 hpi whereas its protein level increased after 24 hpi. In spite of the up-  
501 regulation of MAVS and its positive regulator, expression of its target genes (type I interferon  
502 genes) was very low or undetectable, suggesting that this antiviral pathway is inactivated  
503 during the late phase.

504 Furthermore, different expression profiles were also observed for galectins LGALS.  
505 LGALS3 and 8 (Gal3 and 8) were the most highly expressed among LGALSs and their RNAs  
506 were down-regulated after 24 hpi. However, their proteins remained constant from early to  
507 late phase. Galectins have been shown to involve in innate immune processes (69).  
508 Colocalization of LGALS3 with incoming Ad5 has been observed and its role in Ad5  
509 transport was suggested (70). Stable expression of LGALS3 has been reported previously in  
510 Ad5-infected cells, while it is down-regulated in Ad3-infected cells (71).

511 Apparently, there are features common to genes which participate in important  
512 immune pathways, being suppressed at the transcriptional level while being enhanced or



513 stable at the protein level during the late phase. Thus, we hypothesize that the transcriptional  
514 regulation of these genes is mediated mainly by Ad2, while protein translation machinery is  
515 not yet completely under the control of the virus. The increased protein expression could be  
516 caused by increased translation and/or decreased protein degradation. The facts that most of  
517 downstream genes of immune pathways are down-regulated at RNA level in the late phase  
518 even though their key regulators are stable or up-regulated at the protein level. Apparently,  
519 adenovirus-mediated post-translational mechanisms play a very important role. As discussed  
520 above, inhibition of STAT pathway represent the best example how adenovirus has evolved  
521 redundant strategies to counteract cellular immune response. By regulating protein  
522 modification, blocking of protein-protein interactions, inhibiting of the protein transport to its  
523 destination, or direct interacting, adenovirus controls host cell antiviral pathways. Last but not  
524 least, non-coding RNAs (ncRNAs) have been shown to be important regulators of various  
525 biological processes. Alternations of cellular miRNA and lncRNA expression during Ad2  
526 infection have been studied using RNA-seq (37, 38). Significant changes in their expression  
527 take place after 24 hpi. The strong correlation of ncRNA expression changes with infection  
528 progression indicates that ncRNA play important roles during infection. Specially, majority of  
529 differentially expressed miRNAs were down-regulated in the late phase. One major  
530 mechanisms of miRNA in gene regulation is the suppression of translation through partial  
531 complementary to 3' UTRs of mRNA. Thus, down-regulation of miRNAs could lead to stable  
532 or increase translation of special sets of proteins. In contrast, most of differentially expressed  
533 cellular lncRNAs were up-regulated in the late phase. Several lncRNAs that are predicted to  
534 target immune response genes were down-regulated in the late phase. In addition, a large  
535 share of differentially expressed lncRNA are associated with RNA-binding proteins (RBPs),  
536 being involved in posttranscriptional RNA processing and translation regulation. However,



537 how they are regulated, and how they are involved in the regulation of cellular gene  
538 expression during adenovirus infection needs to be further addressed.

539

540 Acknowledgments

541 Sequencing was performed at the SNP&SEQ Technology Platform at Uppsala University and  
542 University Hospital. We thank Ulrika Liljedahl and Johanna Lagensjö for excellent  
543 sequencing. Martin Dahlö at UPPMAX is acknowledged for helping to make the code run on  
544 the UPPMAX resources. We thank Dr. Caroline Gallant for critical reading of the manuscript.  
545 This work was supported by the Kjell and Märta Beijer Foundation (UP), Åke Wiberg  
546 Foundation (SBL) and Magnus Bergvall Foundation (SBL).

547

548 [References](#)

- 549 1. Ferrari R, Pellegrini M, Horwitz GA, Xie W, Berk AJ, Kurdistani SK. 2008. Epigenetic  
550 reprogramming by adenovirus e1a. *Science* 321:1086-8.
- 551 2. Flint J, Shenk T. 1997. Viral transactivating proteins. *Annu Rev Genet* 31:177-212.
- 552 3. Bayley ST, Mymryk JS. 1994. Adenovirus e1a proteins and transformation (review). *Int J*  
553 *Oncol* 5:425-44.
- 554 4. Braun T, Bober E, Arnold HH. 1992. Inhibition of muscle differentiation by the adenovirus  
555 E1a protein: repression of the transcriptional activating function of the HLH protein Myf-5.  
556 *Genes Dev* 6:888-902.
- 557 5. Caruso M, Martelli F, Giordano A, Felsani A. 1993. Regulation of MyoD gene transcription  
558 and protein function by the transforming domains of the adenovirus E1A oncoprotein.  
559 *Oncogene* 8:267-78.
- 560 6. Chellappan S, Kraus VB, Kroger B, Munger K, Howley PM, Phelps WC, Nevins JR. 1992.  
561 Adenovirus E1A, simian virus 40 tumor antigen, and human papillomavirus E7 protein share  
562 the capacity to disrupt the interaction between transcription factor E2F and the retinoblastoma  
563 gene product. *Proc Natl Acad Sci U S A* 89:4549-53.
- 564 7. Cobrinik D. 1996. Regulatory interactions among E2Fs and cell cycle control proteins. *Curr*  
565 *Top Microbiol Immunol* 208:31-61.
- 566 8. Chakravarti D, Ogryzko V, Kao HY, Nash A, Chen H, Nakatani Y, Evans RM. 1999. A viral  
567 mechanism for inhibition of p300 and PCAF acetyltransferase activity. *Cell* 96:393-403.
- 568 9. Reid JL, Bannister AJ, Zegerman P, Martinez-Balbas MA, Kouzarides T. 1998. E1A directly  
569 binds and regulates the P/CAF acetyltransferase. *EMBO J* 17:4469-77.
- 570 10. Chinnadurai G. 2004. Modulation of oncogenic transformation by the human adenovirus E1A  
571 C-terminal region. *Curr Top Microbiol Immunol* 273:139-61.
- 572 11. Ackrill AM, Foster GR, Laxton CD, Flavell DM, Stark GR, Kerr IM. 1991. Inhibition of the  
573 cellular response to interferons by products of the adenovirus type 5 E1A oncogene. *Nucleic*  
574 *Acids Res* 19:4387-93.

- 575 12. Berhane S, Areste C, Ablack JN, Ryan GB, Blackbourn DJ, Mymryk JS, Turnell AS, Steele  
576 JC, Grand RJ. 2011. Adenovirus E1A interacts directly with, and regulates the level of  
577 expression of, the immunoproteasome component MECL1. *Virology* 421:149-58.
- 578 13. Harada JN, Shevchenko A, Shevchenko A, Pallas DC, Berk AJ. 2002. Analysis of the  
579 adenovirus E1B-55K-anchored proteome reveals its link to ubiquitination machinery. *J Virol*  
580 76:9194-206.
- 581 14. Schwartz RA, Lakdawala SS, Eshleman HD, Russell MR, Carson CT, Weitzman MD. 2008.  
582 Distinct requirements of adenovirus E1b55K protein for degradation of cellular substrates. *J*  
583 *Virol* 82:9043-55.
- 584 15. Querido E, Blanchette P, Yan Q, Kamura T, Morrison M, Boivin D, Kaelin WG, Conaway  
585 RC, Conaway JW, Branton PE. 2001. Degradation of p53 by adenovirus E4orf6 and E1B55K  
586 proteins occurs via a novel mechanism involving a Cullin-containing complex. *Genes Dev*  
587 15:3104-17.
- 588 16. Farrow SN, White JH, Martinou I, Raven T, Pun KT, Grinham CJ, Martinou JC, Brown R.  
589 1995. Cloning of a bcl-2 homologue by interaction with adenovirus E1B 19K. *Nature*  
590 374:731-3.
- 591 17. Han J, Sabbatini P, Perez D, Rao L, Modha D, White E. 1996. The E1B 19K protein blocks  
592 apoptosis by interacting with and inhibiting the p53-inducible and death-promoting Bax  
593 protein. *Genes Dev* 10:461-77.
- 594 18. Lomonosova E, Subramanian T, Chinnadurai G. 2005. Mitochondrial localization of p53  
595 during adenovirus infection and regulation of its activity by E1B-19K. *Oncogene* 24:6796-  
596 808.
- 597 19. Wold WS, Tollefson AE, Hermiston TW. 1995. E3 transcription unit of adenovirus. *Curr Top*  
598 *Microbiol Immunol* 199 ( Pt 1):237-74.
- 599 20. Bennett EM, Bennink JR, Yewdell JW, Brodsky FM. 1999. Cutting edge: adenovirus E19 has  
600 two mechanisms for affecting class I MHC expression. *J Immunol* 162:5049-52.
- 601 21. Burgert HG, Kvist S. 1987. The E3/19K protein of adenovirus type 2 binds to the domains of  
602 histocompatibility antigens required for CTL recognition. *EMBO J* 6:2019-26.

- 603 22. Wold WS, Doronin K, Toth K, Kuppuswamy M, Lichtenstein DL, Tollefson AE. 1999.  
604 Immune responses to adenoviruses: viral evasion mechanisms and their implications for the  
605 clinic. *Curr Opin Immunol* 11:380-6.
- 606 23. Tollefson AE, Toth K, Doronin K, Kuppuswamy M, Doronina OA, Lichtenstein DL,  
607 Hermiston TW, Smith CA, Wold WS. 2001. Inhibition of TRAIL-induced apoptosis and  
608 forced internalization of TRAIL receptor 1 by adenovirus proteins. *J Virol* 75:8875-87.
- 609 24. Friedman JM, Horwitz MS. 2002. Inhibition of tumor necrosis factor alpha-induced NF-kappa  
610 B activation by the adenovirus E3-10.4/14.5K complex. *J Virol* 76:5515-21.
- 611 25. Neill SD, Hemstrom C, Virtanen A, Nevins JR. 1990. An adenovirus E4 gene product trans-  
612 activates E2 transcription and stimulates stable E2F binding through a direct association with  
613 E2F. *Proc Natl Acad Sci U S A* 87:2008-12.
- 614 26. Obert S, O'Connor RJ, Schmid S, Hearing P. 1994. The adenovirus E4-6/7 protein  
615 transactivates the E2 promoter by inducing dimerization of a heteromeric E2F complex. *Mol*  
616 *Cell Biol* 14:1333-46.
- 617 27. Leppard KN, Everett RD. 1999. The adenovirus type 5 E1b 55K and E4 Orf3 proteins  
618 associate in infected cells and affect ND10 components. *J Gen Virol* 80 ( Pt 4):997-1008.
- 619 28. Kleinberger T, Shenk T. 1993. Adenovirus E4orf4 protein binds to protein phosphatase 2A,  
620 and the complex down regulates E1A-enhanced junB transcription. *J Virol* 67:7556-60.
- 621 29. Chow LT, Broker TR, Lewis JB. 1979. Complex splicing patterns of RNAs from the early  
622 regions of adenovirus-2. *J Mol Biol* 134:265-303.
- 623 30. Jones N. 1995. Transcriptional modulation by the adenovirus E1A gene. *Curr Top Microbiol*  
624 *Immunol* 199 ( Pt 3):59-80.
- 625 31. Cuesta R, Xi Q, Schneider RJ. 2000. Adenovirus-specific translation by displacement of  
626 kinase Mnk1 from cap-initiation complex eIF4F. *EMBO J* 19:3465-74.
- 627 32. Farley DC, Brown JL, Leppard KN. 2004. Activation of the early-late switch in adenovirus  
628 type 5 major late transcription unit expression by L4 gene products. *J Virol* 78:1782-91.

- 629 33. Hayes BW, Telling GC, Myat MM, Williams JF, Flint SJ. 1990. The adenovirus L4 100-  
630 kilodalton protein is necessary for efficient translation of viral late mRNA species. *J Virol*  
631 64:2732-42.
- 632 34. Bridge E, Ketner G. 1990. Interaction of adenoviral E4 and E1b products in late gene  
633 expression. *Virology* 174:345-53.
- 634 35. Flint SJ, Gonzalez RA. 2003. Regulation of mRNA production by the adenoviral E1B 55-kDa  
635 and E4 Orf6 proteins. *Curr Top Microbiol Immunol* 272:287-330.
- 636 36. Zhao H, Granberg F, Pettersson U. 2007. How adenovirus strives to control cellular gene  
637 expression. *Virology* 363:357-75.
- 638 37. Zhao H, Chen M, Lind SB, Pettersson U. 2016. Distinct temporal changes in host cell lncRNA  
639 expression during the course of an adenovirus infection. *Virology* 492:242-50.
- 640 38. Zhao H, Chen M, Tellgren-Roth C, Pettersson U. 2015. Fluctuating expression of microRNAs  
641 in adenovirus infected cells. *Virology* 478:99-111.
- 642 39. Zhao H, Konzer A, Mi J, Chen M, Pettersson U, Lind SB. 2017. Posttranscriptional  
643 Regulation in Adenovirus Infected Cells. *J Proteome Res* 16:872-888.
- 644 40. Miller DL, Myers CL, Rickards B, Collier HA, Flint SJ. 2007. Adenovirus type 5 exerts  
645 genome-wide control over cellular programs governing proliferation, quiescence, and survival.  
646 *Genome Biol* 8:R58.
- 647 41. Evans VC, Barker G, Heesom KJ, Fan J, Bessant C, Matthews DA. 2012. De novo derivation  
648 of proteomes from transcriptomes for transcript and protein identification. *Nat Methods*  
649 9:1207-11.
- 650 42. Zhao H, Dahlo M, Isaksson A, Syvanen AC, Pettersson U. 2012. The transcriptome of the  
651 adenovirus infected cell. *Virology* 424:115-28.
- 652 43. Ying B, Toth K, Spencer JF, Aurora R, Wold WS. 2015. Transcriptome sequencing and  
653 development of an expression microarray platform for liver infection in adenovirus type 5-  
654 infected Syrian golden hamsters. *Virology* 485:305-12.
- 655 44. Yates JR, Ruse CI, Nakorchevsky A. 2009. Proteomics by mass spectrometry: approaches,  
656 advances, and applications. *Annu Rev Biomed Eng* 11:49-79.

- 657 45. Ong SE, Mann M. 2006. A practical recipe for stable isotope labeling by amino acids in cell  
658 culture (SILAC). *Nat Protoc* 1:2650-60.
- 659 46. Lam YW, Evans VC, Heesom KJ, Lamond AI, Matthews DA. 2010. Proteomics analysis of  
660 the nucleolus in adenovirus-infected cells. *Mol Cell Proteomics* 9:117-30.
- 661 47. Fu YR, Turnell AS, Davis S, Heesom KJ, Evans VC, Matthews DA. 2017. Comparison of  
662 protein expression during wild-type, and E1B-55k-deletion, adenovirus infection using  
663 quantitative time-course proteomics. *J Gen Virol* 98:1377-1388.
- 664 48. Hung G, Flint SJ. 2017. Normal human cell proteins that interact with the adenovirus type 5  
665 E1B 55kDa protein. *Virology* 504:12-24.
- 666 49. Trapnell C, Roberts A, Goff L, Pertea G, Kim D, Kelley DR, Pimentel H, Salzberg SL, Rinn  
667 JL, Pachter L. 2012. Differential gene and transcript expression analysis of RNA-seq  
668 experiments with TopHat and Cufflinks. *Nat Protoc* 7:562-78.
- 669 50. Audic S, Claverie JM. 1997. The significance of digital gene expression profiles. *Genome Res*  
670 7:986-95.
- 671 51. Tarazona S, Garcia-Alcalde F, Dopazo J, Ferrer A, Conesa A. 2011. Differential expression in  
672 RNA-seq: a matter of depth. *Genome Res* 21:2213-23.
- 673 52. Huang da W, Sherman BT, Lempicki RA. 2009. Systematic and integrative analysis of large  
674 gene lists using DAVID bioinformatics resources. *Nat Protoc* 4:44-57.
- 675 53. Philipson L. 1961. Adenovirus assay by the fluorescent cellcounting procedure. *Virology*  
676 15:263-268.
- 677 54. Shevchenko A, Chernushevich I, Wilm M, Mann M. 2000. De Novo peptide sequencing by  
678 nanoelectrospray tandem mass spectrometry using triple quadrupole and quadrupole/time-of-  
679 flight instruments. *Methods Mol Biol* 146:1-16.
- 680 55. Cox J, Matic I, Hilger M, Nagaraj N, Selbach M, Olsen JV, Mann M. 2009. A practical guide  
681 to the MaxQuant computational platform for SILAC-based quantitative proteomics. *Nat*  
682 *Protoc* 4:698-705.
- 683 56. Kielbasa SM, Klein H, Roeder HG, Vingron M, Bluthgen N. 2010. TransFind--predicting  
684 transcriptional regulators for gene sets. *Nucleic Acids Res* 38:W275-80.

- 685 57. Gaboli M, Kotsi PA, Gurrieri C, Cattoretti G, Ronchetti S, Cordon-Cardo C, Broxmeyer HE,  
686 Hromas R, Pandolfi PP. 2001. Mzf1 controls cell proliferation and tumorigenesis. *Genes Dev*  
687 15:1625-30.
- 688 58. Frisch SM, Mymryk JS. 2002. Adenovirus-5 E1A: paradox and paradigm. *Nat Rev Mol Cell*  
689 *Biol* 3:441-52.
- 690 59. Lang SE, Hearing P. 2003. The adenovirus E1A oncoprotein recruits the cellular  
691 TRRAP/GCN5 histone acetyltransferase complex. *Oncogene* 22:2836-41.
- 692 60. Randall RE, Goodbourn S. 2008. Interferons and viruses: an interplay between induction,  
693 signalling, antiviral responses and virus countermeasures. *J Gen Virol* 89:1-47.
- 694 61. Kim TK, Maniatis T. 1996. Regulation of interferon-gamma-activated STAT1 by the  
695 ubiquitin-proteasome pathway. *Science* 273:1717-9.
- 696 62. Wen Z, Zhong Z, Darnell JE, Jr. 1995. Maximal activation of transcription by Stat1 and Stat3  
697 requires both tyrosine and serine phosphorylation. *Cell* 82:241-50.
- 698 63. Bhattacharya S, Eckner R, Grossman S, Oldread E, Arany Z, D'Andrea A, Livingston DM.  
699 1996. Cooperation of Stat2 and p300/CBP in signalling induced by interferon-alpha. *Nature*  
700 383:344-7.
- 701 64. Kalvakolanu DV, Bandyopadhyay SK, Harter ML, Sen GC. 1991. Inhibition of interferon-  
702 inducible gene expression by adenovirus E1A proteins: block in transcriptional complex  
703 formation. *Proc Natl Acad Sci U S A* 88:7459-63.
- 704 65. Leonard GT, Sen GC. 1996. Effects of adenovirus E1A protein on interferon-signaling.  
705 *Virology* 224:25-33.
- 706 66. Chahal JS, Gallagher C, DeHart CJ, Flint SJ. 2013. The repression domain of the E1B 55-  
707 kilodalton protein participates in countering interferon-induced inhibition of adenovirus  
708 replication. *J Virol* 87:4432-44.
- 709 67. Spurrell E, Gangeswaran R, Wang P, Cao F, Gao D, Feng B, Wold W, Tollefson A, Lemoine  
710 NR, Wang Y. 2014. STAT1 interaction with E3-14.7K in monocytes affects the efficacy of  
711 oncolytic adenovirus. *J Virol* 88:2291-300.

- 712 68. Sohn SY, Hearing P. 2011. Adenovirus sequesters phosphorylated STAT1 at viral replication  
713 centers and inhibits STAT dephosphorylation. *J Virol* 85:7555-62.
- 714 69. Rabinovich GA, Toscano MA. 2009. Turning 'sweet' on immunity: galectin-glycan  
715 interactions in immune tolerance and inflammation. *Nat Rev Immunol* 9:338-52.
- 716 70. Maier O, Marvin SA, Wodrich H, Campbell EM, Wiethoff CM. 2012. Spatiotemporal  
717 dynamics of adenovirus membrane rupture and endosomal escape. *J Virol* 86:10821-8.
- 718 71. Trinh HV, Grossmann J, Gehrig P, Roschitzki B, Schlapbach R, Greber UF, Hemmi S. 2013.  
719 iTRAQ-Based and Label-Free Proteomics Approaches for Studies of Human Adenovirus  
720 Infections. *Int J Proteomics* 2013:581862.

721

722



723 Figure legends

724 Figure 1. Based on the kinetics of transcription changes, the differentially expressed genes were  
725 grouped into 20 clusters (C1-C20). The numbers of genes in each cluster and the number of  
726 differentially expressed genes identified at each time point were indicated on the right hand side (Note  
727 that the numbers of genes at 12, 24 and 36 hpi are different to the Table 1 because many genes were  
728 identified as differentially expressed at more than one time point, but included only in one cluster).  
729 The biological functions of genes in each cluster were analyzed using DAVID (left). Red, green and  
730 white arrow bars represent RNAs that were up-, down-regulated or unchanged in Ad2-infected cells in  
731 comparison to RNA in uninfected control.

732 Figure 2. Schematic representation of key components of NF $\kappa$ B (A), STAT (B), apoptosis (C) and  
733 MAVS (D) pathways. The involvement of Ad2 proteins is also indicated. Graphs display the  
734 expression profiles (fold change between Ad2 and mock) of genes that detected at both protein (dash  
735 line) and RNA (solid line) levels at 4 time points. The same color is used for the corresponding protein  
736 and RNA.

Table 1. In total 12,927 cellular mRNAs were detected in five time points together. Among them 9,738 mRNAs were common between all time points. Expression of 6,860 mRNAs reached to a significant level with a minimum of 10 FPKM. Among them 3556 genes expressions were changed  $\geq 2$ -fold in infected cells as compared to non-infected cells. Numbers of mRNAs at each time point are listed here.

| <b>Selection</b>                       | <b>Mock</b> | <b>Ad2-6 hpi</b> | <b>Ad2-12 hpi</b> | <b>Ad2-24 hpi</b> | <b>Ad2-36 hpi</b> |
|----------------------------------------|-------------|------------------|-------------------|-------------------|-------------------|
| <b><math>\geq 1</math> FPKM</b>        | 11064       | 11163            | 11837             | 11426             | 11191             |
| <b><math>\geq 10</math> FPKM</b>       | 5001        | 4846             | 5184              | 4692              | 4371              |
| <b><math>\geq 2</math>-Fold change</b> |             | 74 <sup>a</sup>  | 223               | 2239              | 3060              |
| <b>Up-regulated</b>                    |             | 65 <sup>b</sup>  | 138               | 1694              | 2142              |
| <b>Down-regulated</b>                  |             | 9 <sup>c</sup>   | 85                | 545               | 918               |

<sup>a</sup>Number of genes expression with or decrease in Ad2-infected as compared to uninfected cells as measured by sequence reads.

<sup>b</sup>Number of genes expression with more than 2-fold increase in Ad2-infected as compared to uninfected cells.

<sup>c</sup>Number of genes expression with more than 2-fold decrease in Ad2-infected as compared to uninfected cells.

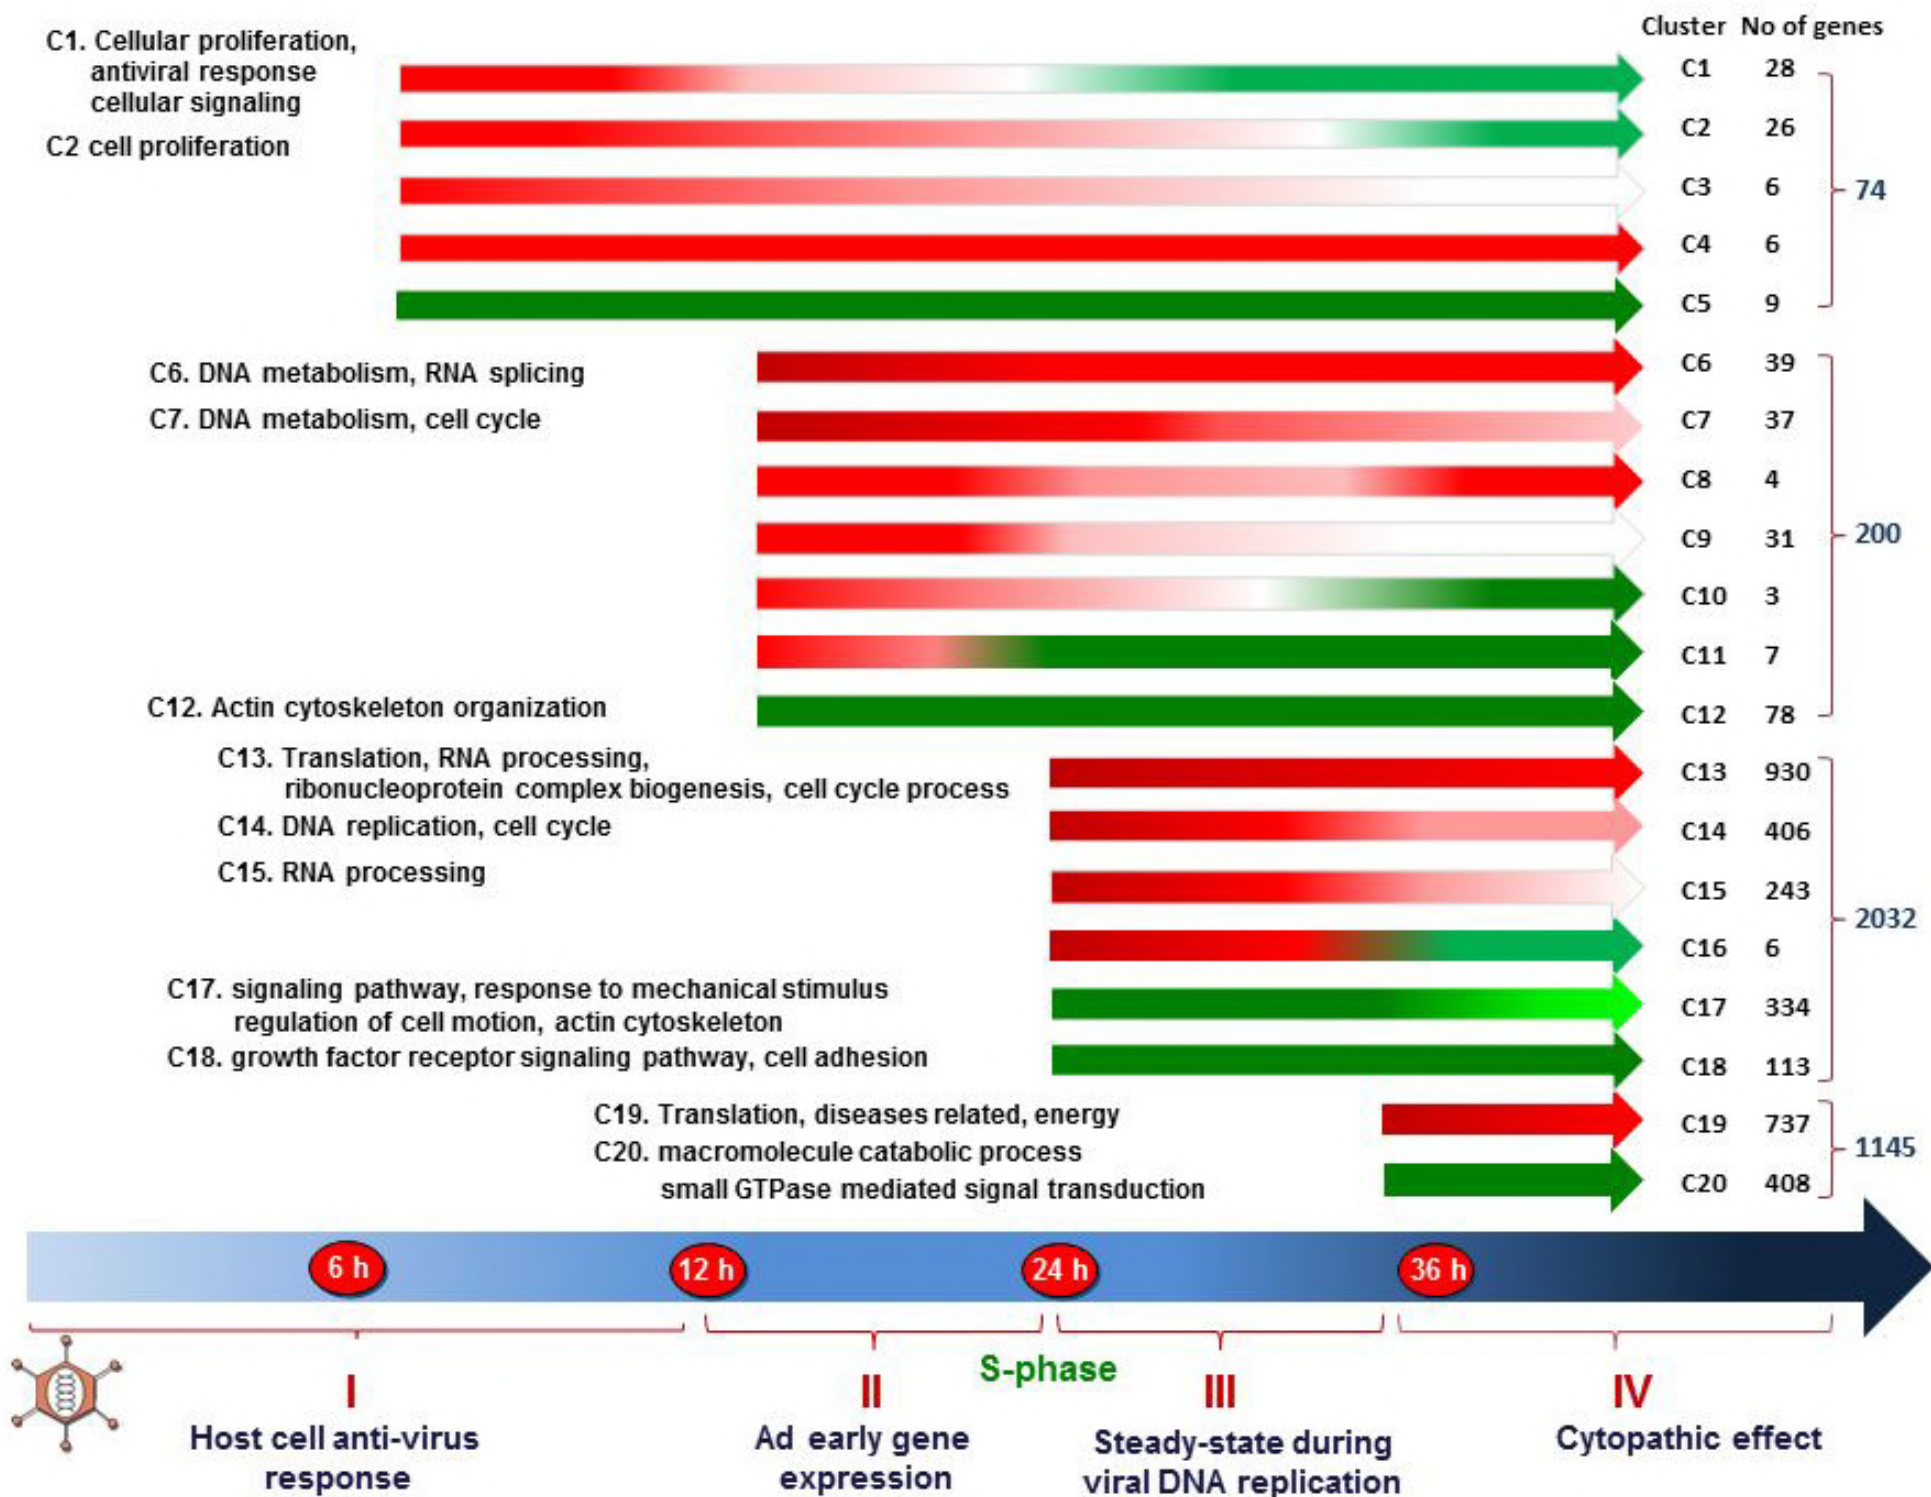

### A NfκB Signaling

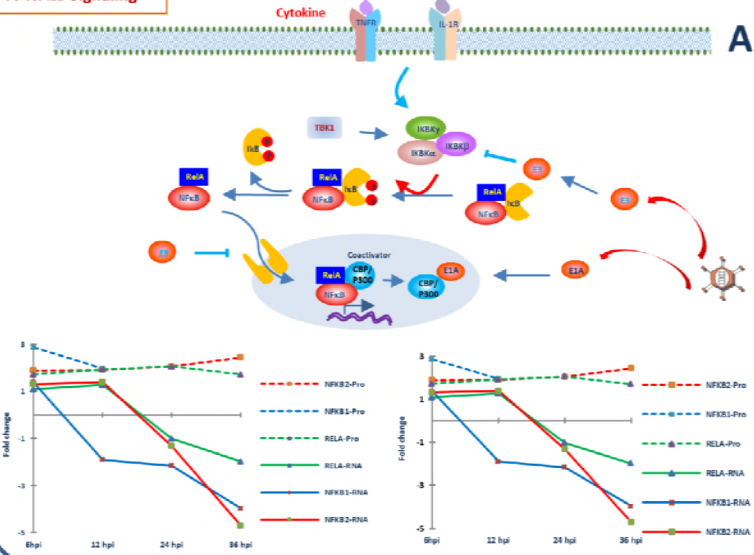

### B STAT signaling

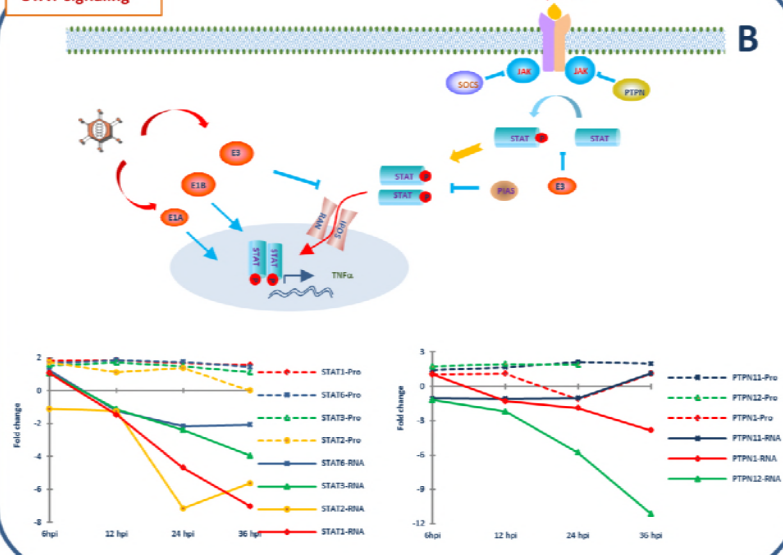

### C Apoptosis

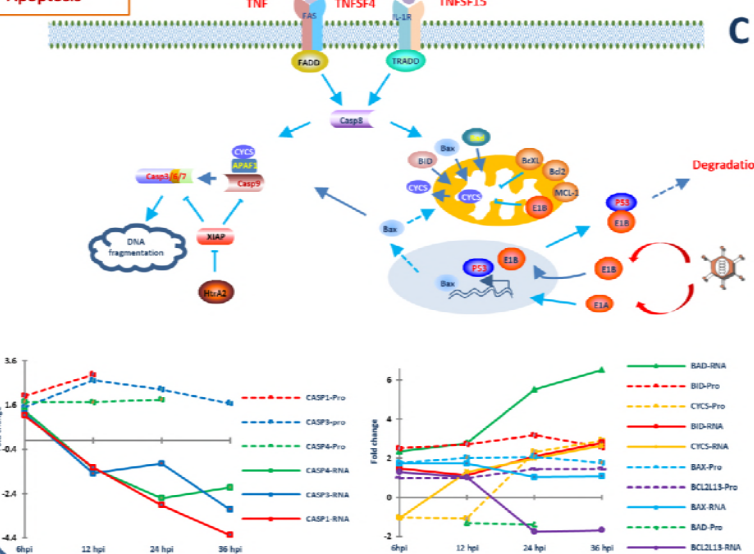

### D MAVS signaling

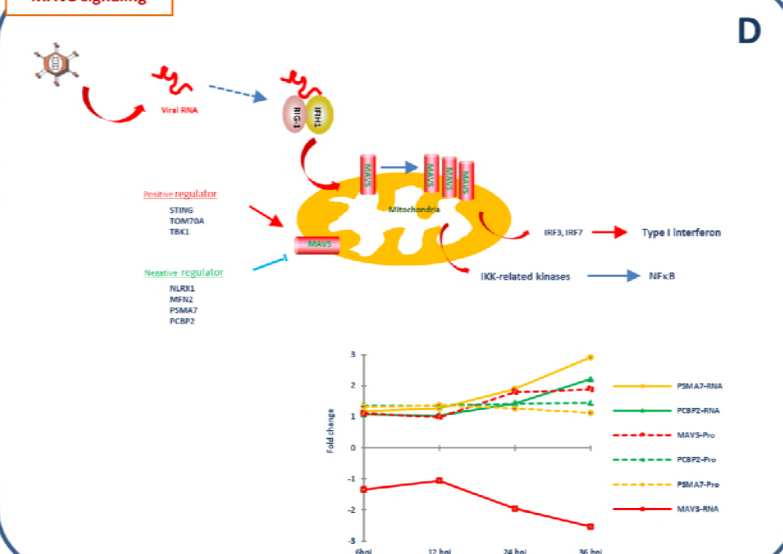

Source: https://www.biorxiv.org/content/10.1101/302851v1.full.pdf
